# Supplementary material for: EB1 and cytoplasmic dynein mediate protrusion dynamics for efficient 3-dimensional cell migration
Source: PubMed Central journal article supplement (PMC5893312; doi:10.1096/fj.201700444rr), 2017-11-02

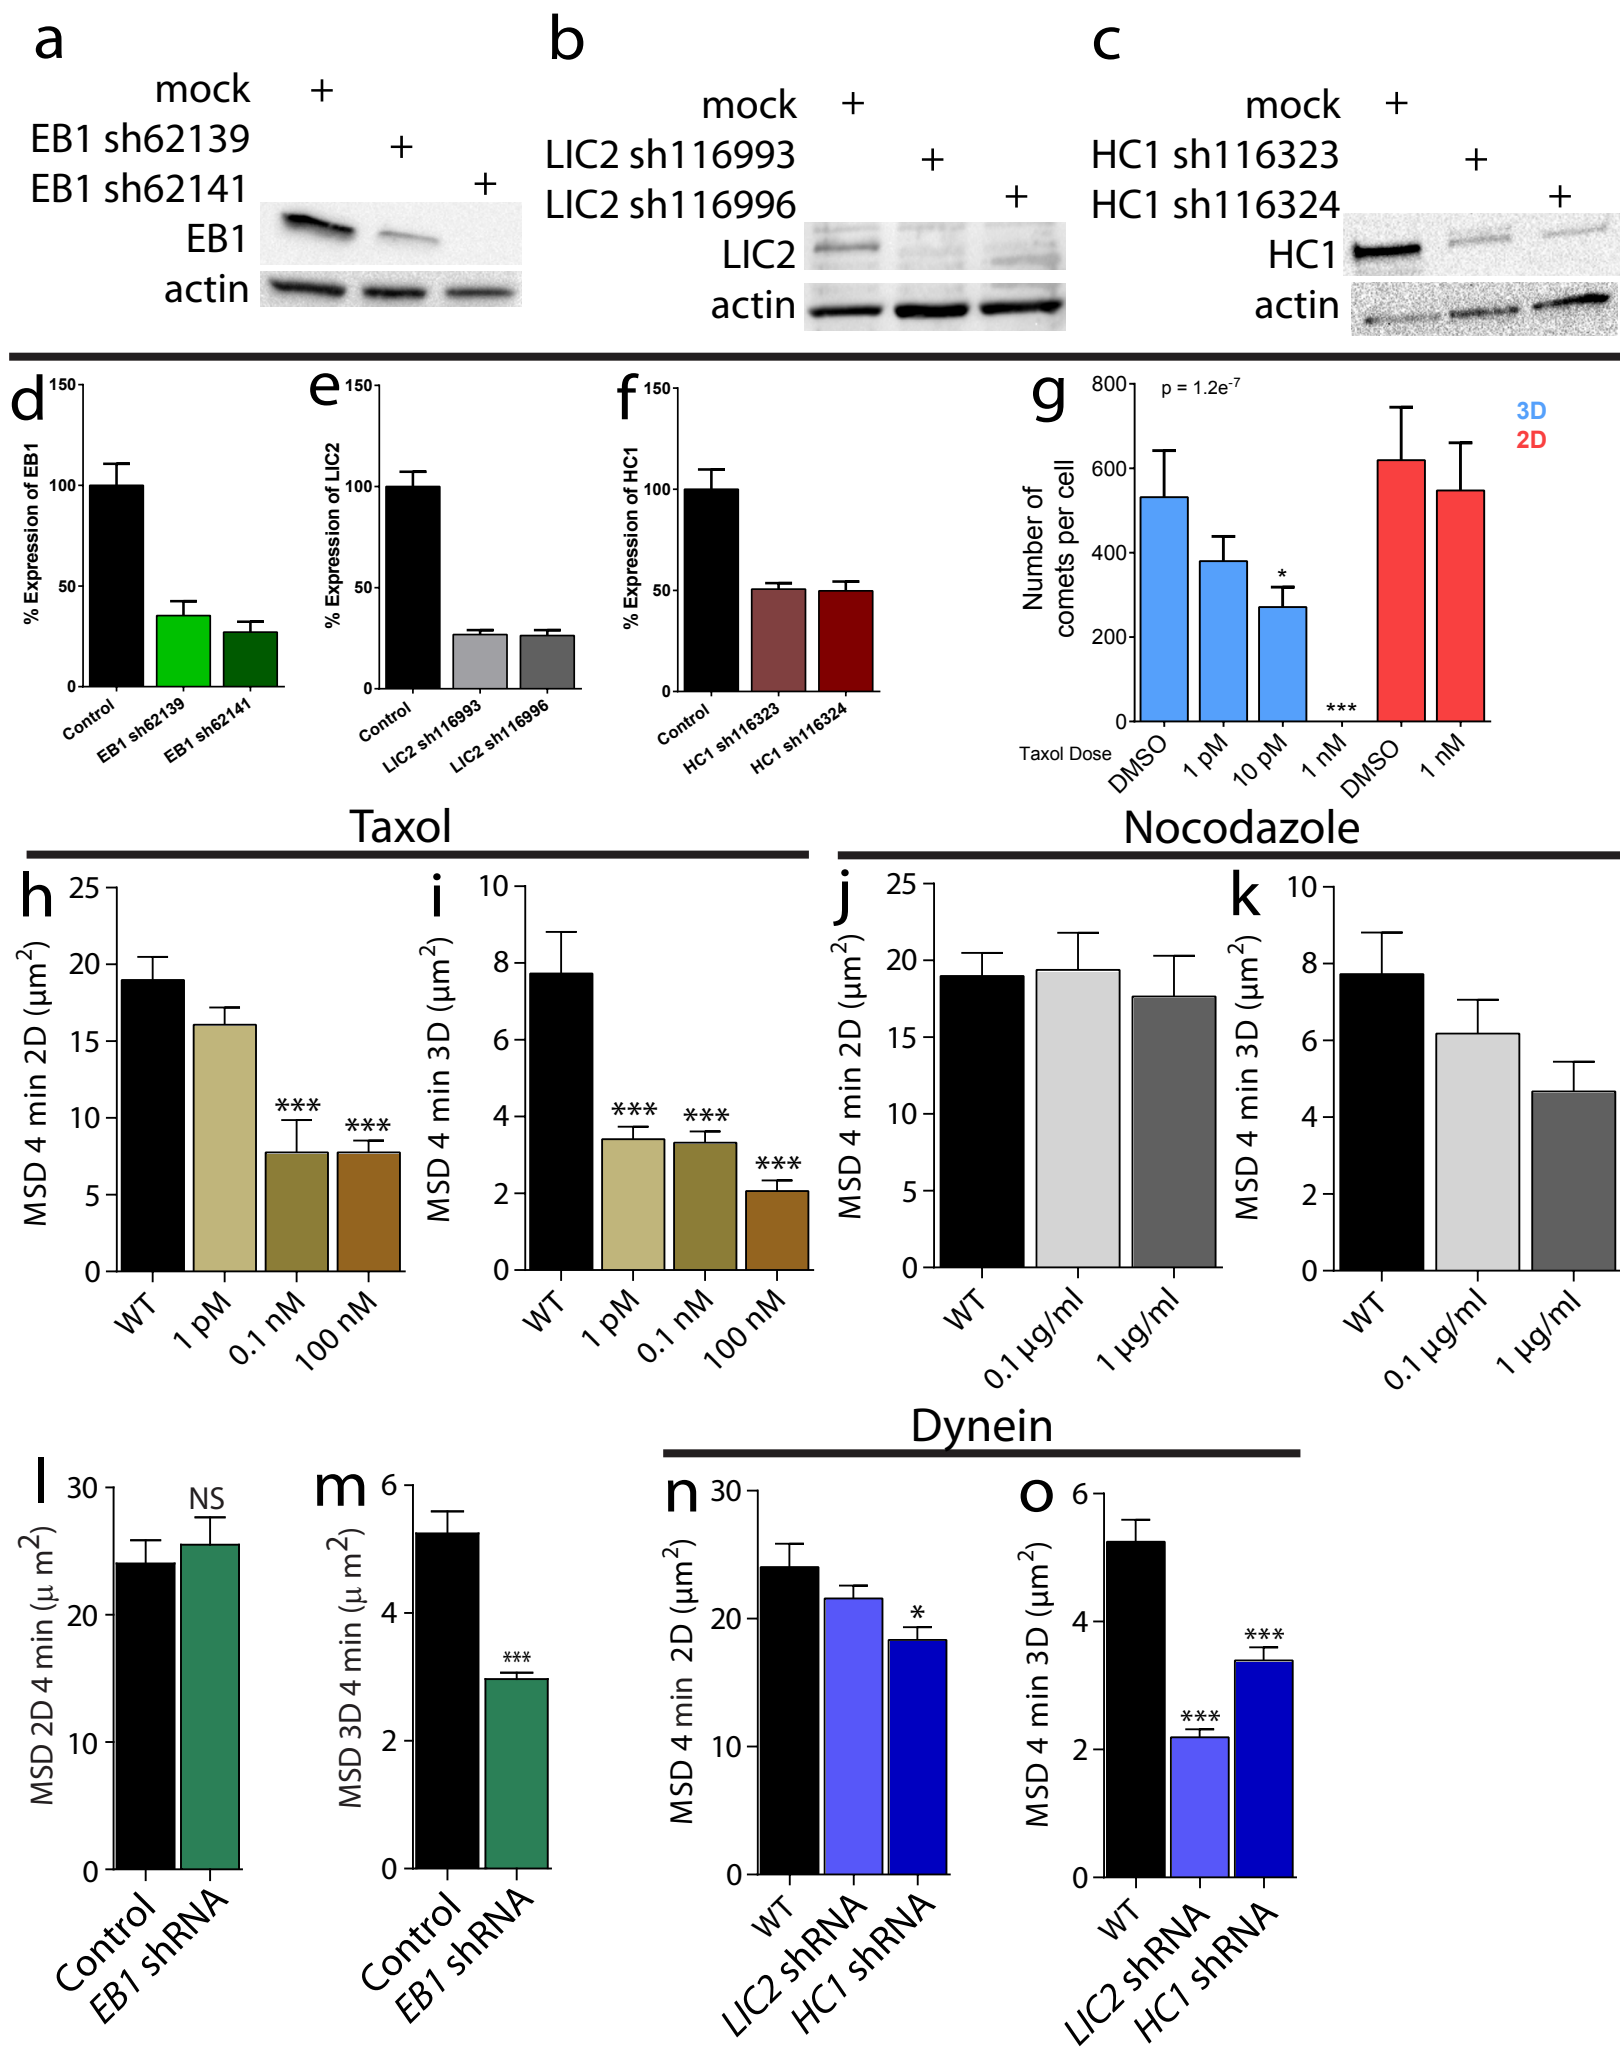

Supplemental figure 1 - Jayatilaka et al.

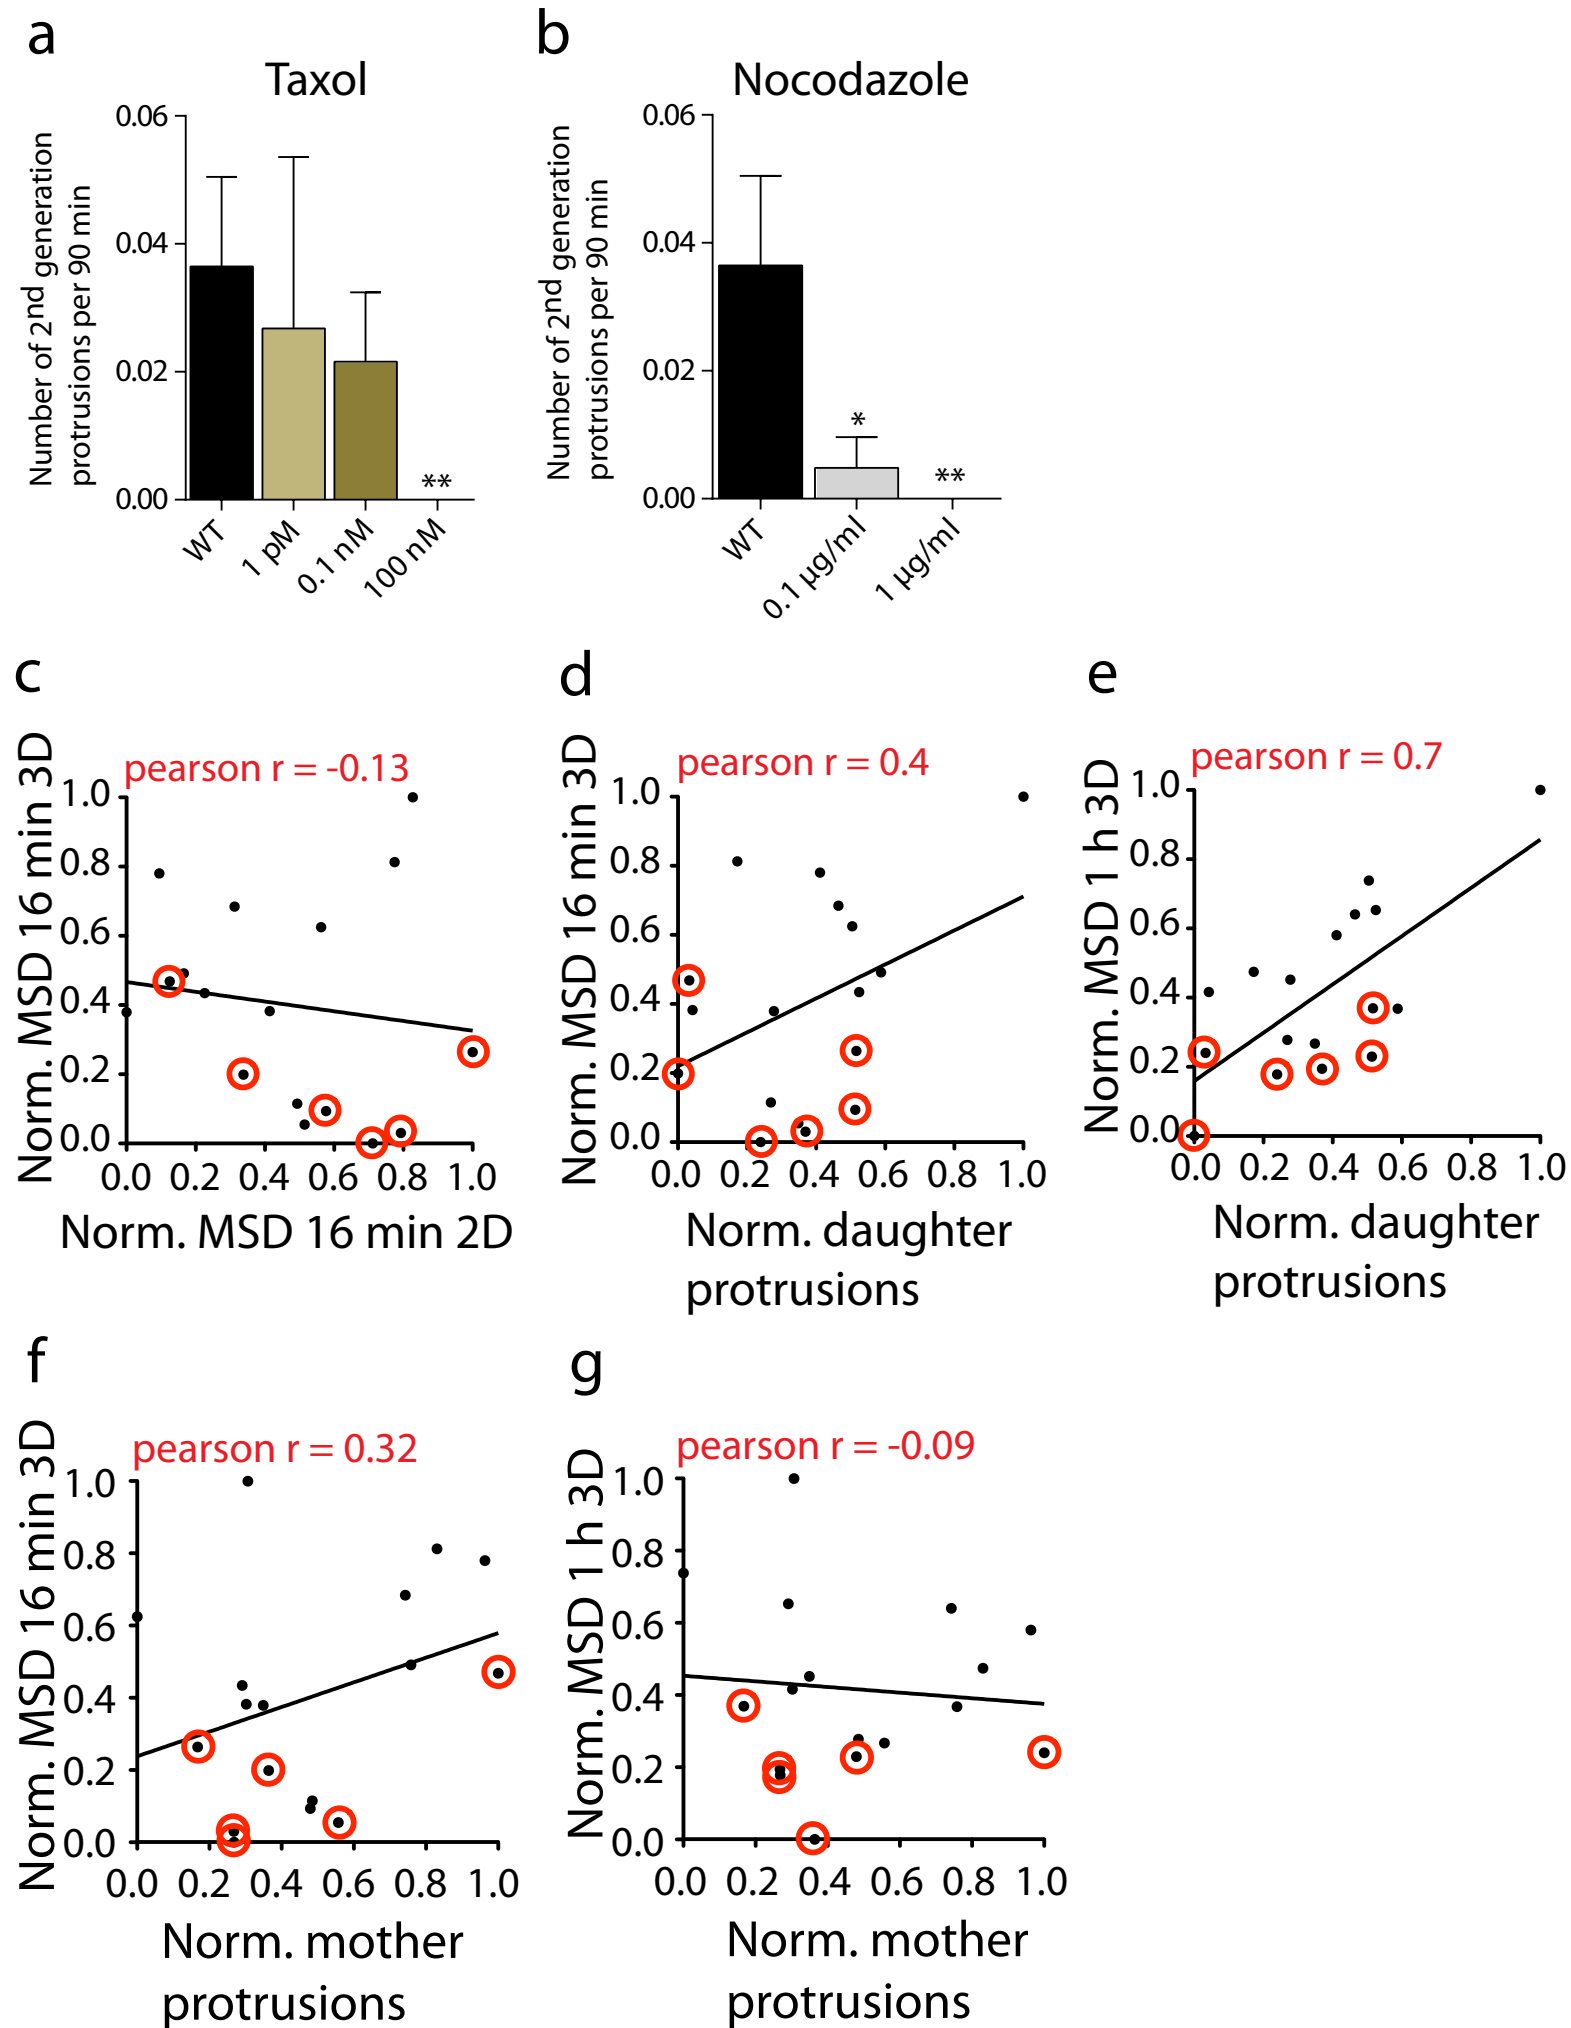

## LAMP1

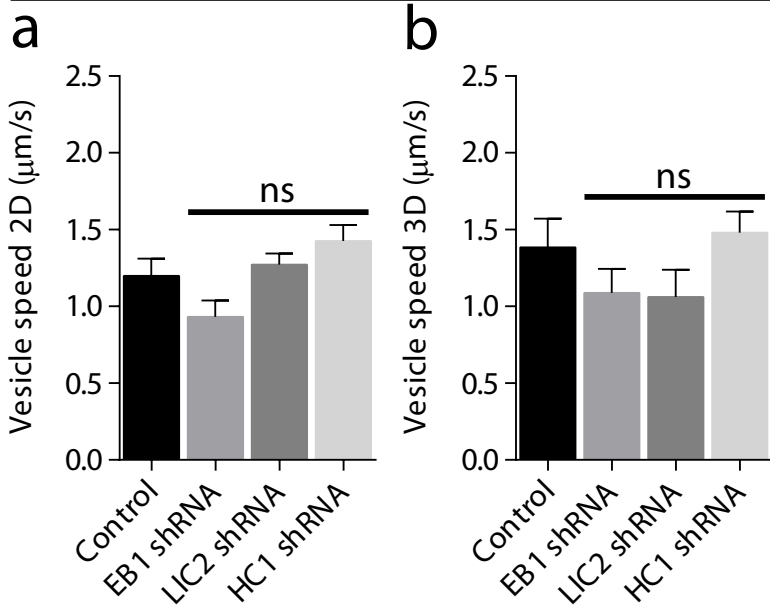

## VAMP3

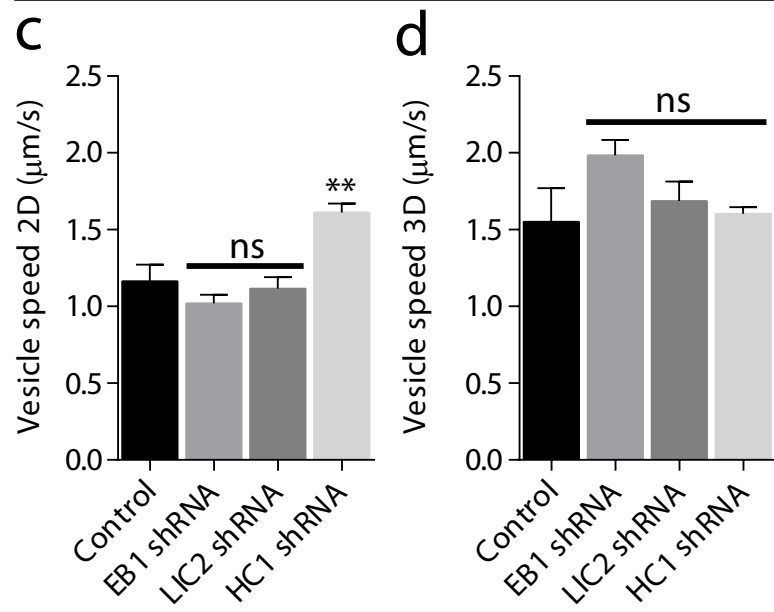

**e**

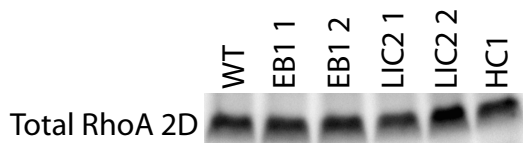

**f**

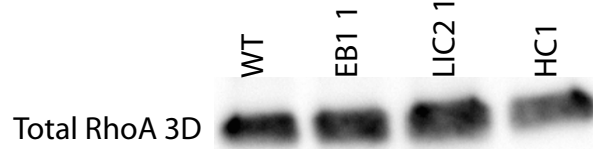

# Nocodazole

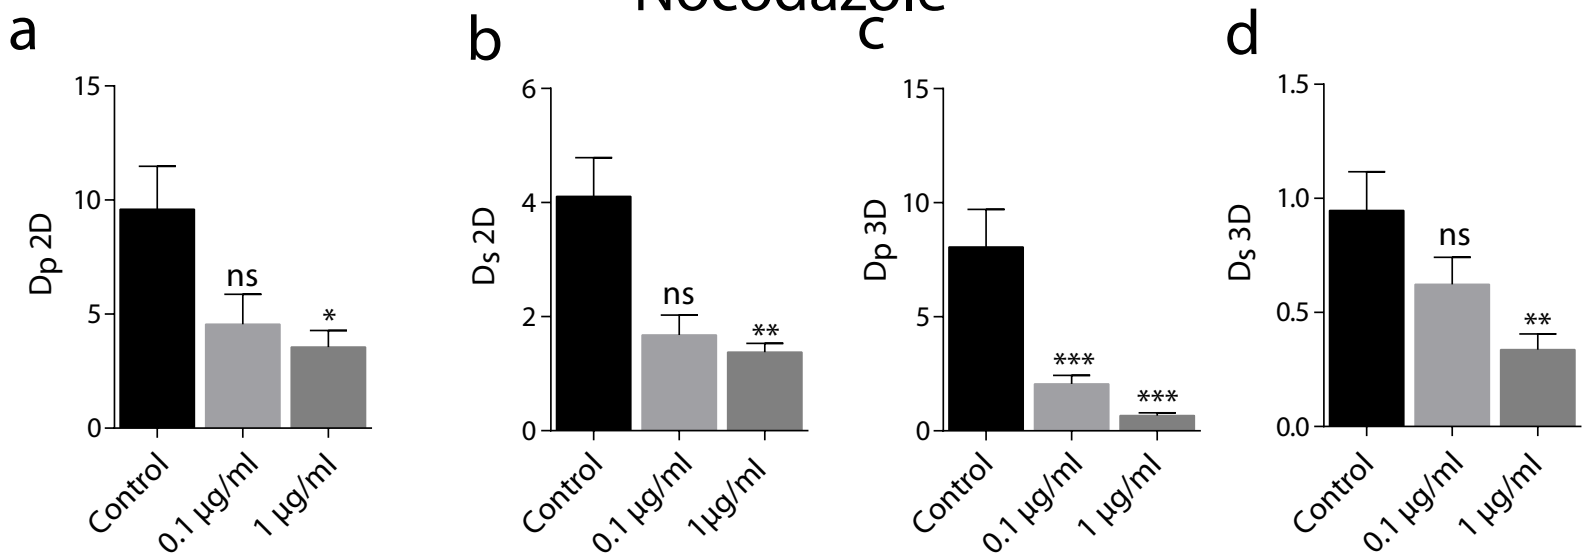

# Taxol

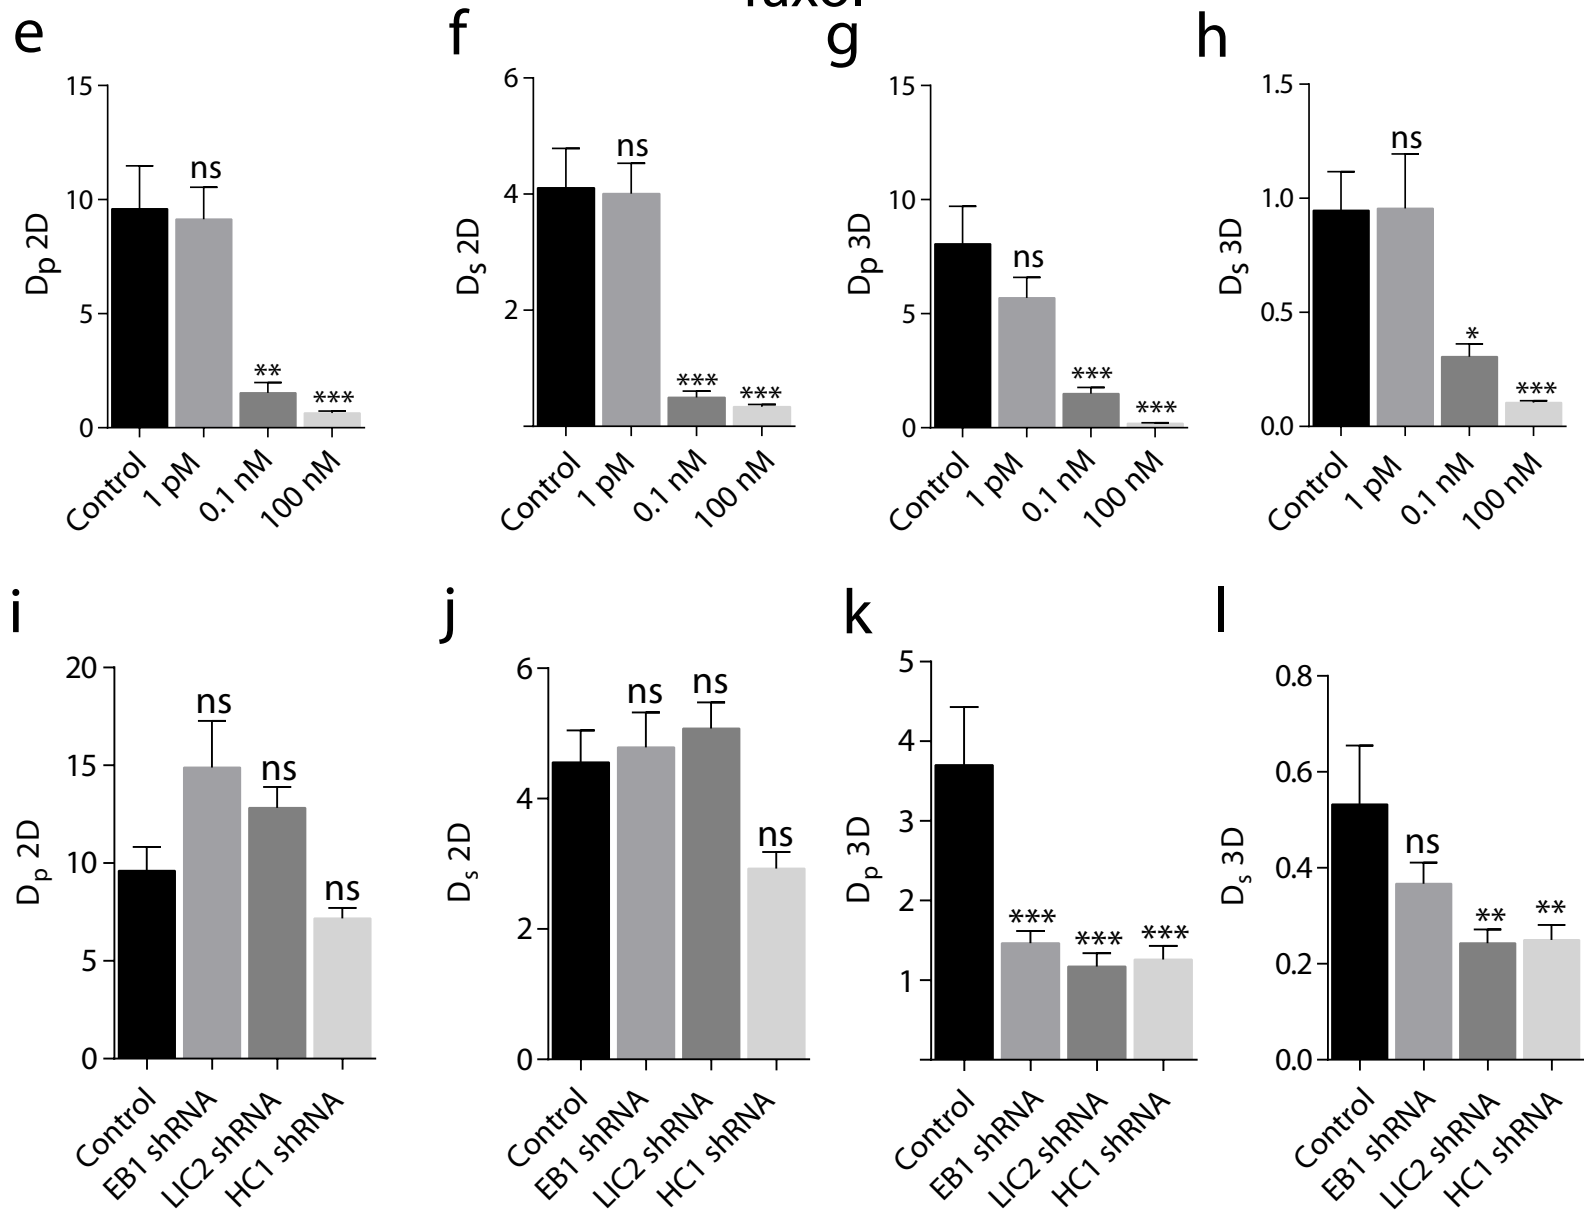

Supplement: fj.201700444RR.sf1.pdf [file fj.201700444RR.sf1.pdf]
